# Supplementary material for: Molecular difference between WASP and N-WASP critical for chemotaxis of T-cells towards SDF-1α
Source: PubMed Central journal article supplement (PMC4604493; doi:10.1038/srep15031), 2015-10-14

## **Molecular difference between WASP and N-WASP critical for chemotaxis of T-cells towards SDF-1 $\alpha$**

Neeraj Jain and Thirumaran Thanabalu\*

**Figure S1: Expression of N-WASP is lower than WASP in primary T cells.** Quantitative real time PCR analysis of WASP and N-WASP expression at mRNA level in non-activated and activated splenocytes. \*\*\*  $P < 0.001$

**Figure S2: S1 WASP shRNA was specific to WASP.** Expression of WASP-GFP, N-WASP-GFP and WASP<sub>R</sub>-GFP in HEK293T cells transfected with or without S1 WASP shRNA using anti-GFP ( $\alpha$ -GFP) antibody.

**Figure S3: WASP $\Delta$ <sup>I30</sup> together with WIP can rescue the growth defect of *las17 $\Delta$*  strain.**

**A)** Viability at 24 and 37°C of *las17 $\Delta$*  yeast strain IDY166 transformed with full length WT WASP or WASP $\Delta$ <sup>I30</sup> expressing plasmids with WIP or empty vector (Vect).

**B)** Western blot analysis of WASP and WASP $\Delta$ <sup>I30</sup> expressed with WIP or empty vector (Vect) in *las17 $\Delta$*  yeast strain.

**Figure S4: I30 region is critical for Nck1 and Toca1 induced conformation change**

**A)** Quantification of fluorescence signal from 100 *S. cerevisiae* cells transformed with NLS-WIP + WASP sensor or NLS-WIP + WASP $\Delta$ <sup>I30</sup> sensor together with (1) Vector or (2) Nck1 (3) Toca1 expressing plasmids. \*\*\* $P < 0.001$  compared to WASP sensor + NLS WIP + Vector. \*\* $P < 0.01$

**B)** Analysis of expression of the WASP sensors or WIP in *S. cerevisiae* cells. Anti-Hexokinase ( $\alpha$ -Hex) was used for endogenous control.

**Figure S5: I30 region interacts with Hck.**

(A) Schematic diagram showing the WASP and WASP deletion mutants generated for His-tag pull down assay.

(B) HEK293T cells were transfected with Hck together with (1) Vector (2) WASP-His, (3) WASP<sup>ΔI30</sup>-His, (4) WASP<sub>138-320</sub>-His (5) WASP<sub>138-320</sub><sup>ΔI30</sup>-His. The WASP or WASP deletion mutants were isolated by His-tag pull-down assay. \* represent the degradation product of WASP or its deletion mutants.

(C) **Deletion of I30 region enhanced Hck mediated WASP phosphorylation.** HEK293T cells were transfected with WASP-His or WASP<sup>ΔI30</sup>-His together with (1) Vector, (2) Hck-GFP. WASP or WASP<sup>ΔI30</sup> was isolated by His-tag pull-down assay. Hck expression was detected using anti-GFP antibody. Tyrosine-phosphorylation levels of WASP and WASP<sup>ΔI30</sup> was detected using 4G10 antibody.

**Figure S6: Directionality of migration is random in N-WASP expressing Jurkat<sup>W<sup>K</sup>D</sup> T-cells.**

Time lapsed images of WASP<sub>R</sub> or N-WASP expressing Jurkat<sup>W<sup>K</sup>D</sup> T-cells in Dunn chamber assay.

# Supplementary

S1)

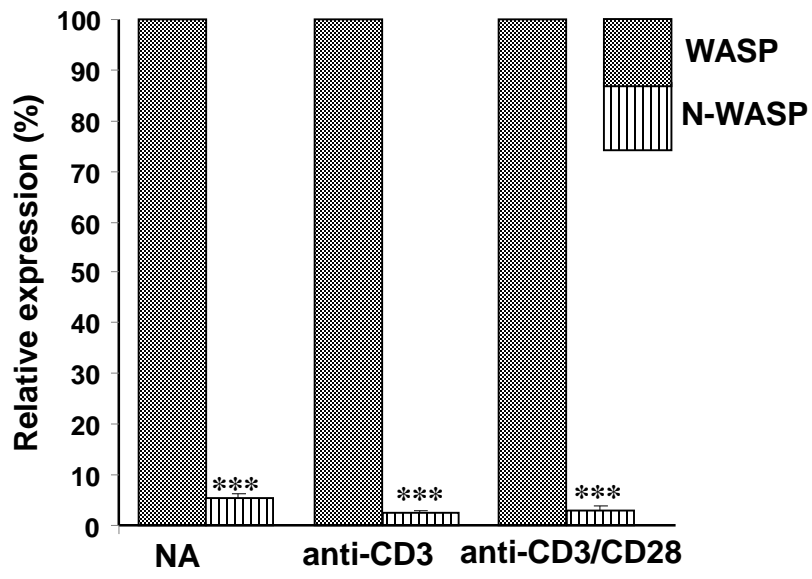

# Supplementary

## S2)

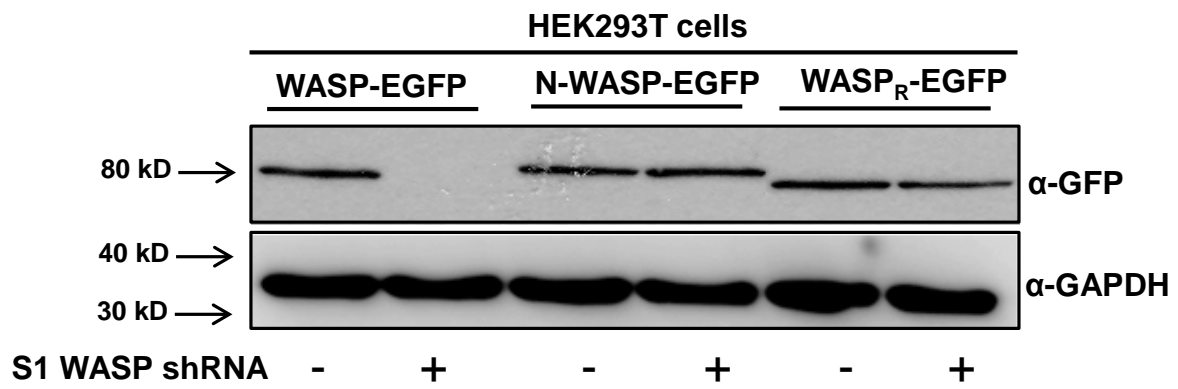

S3)

A)

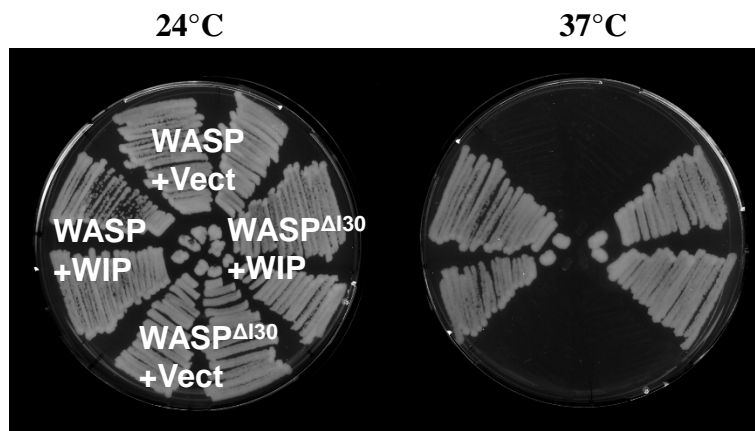

B)

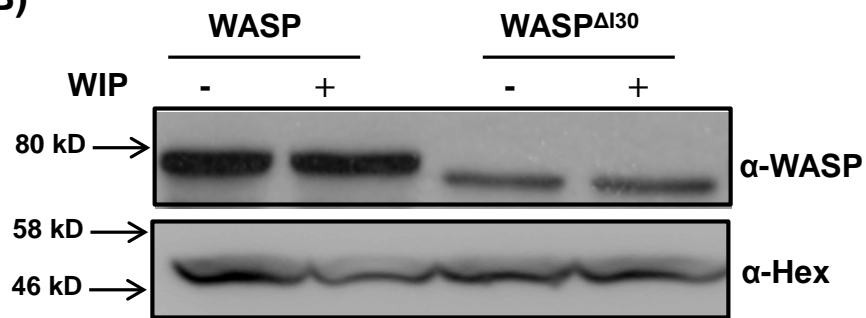

S4)

(A)

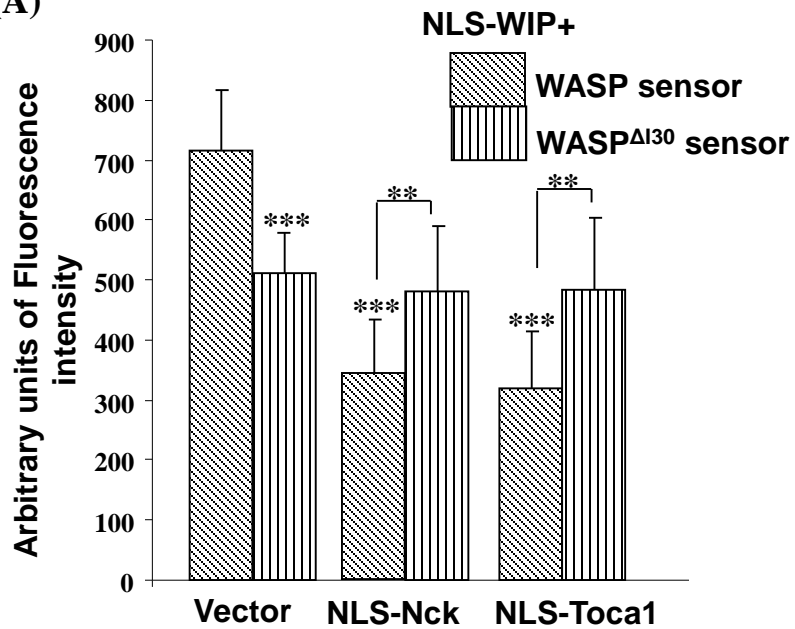

(B)

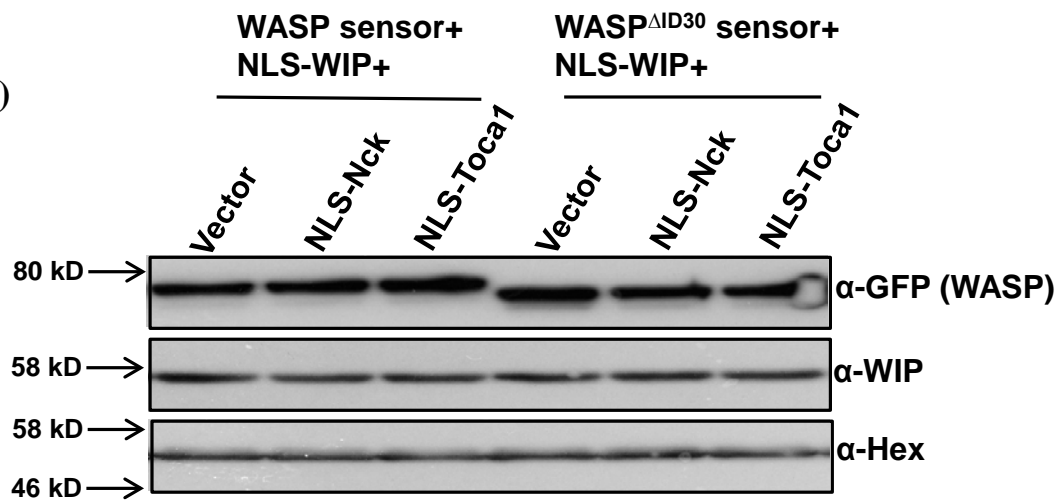

S5)

A)

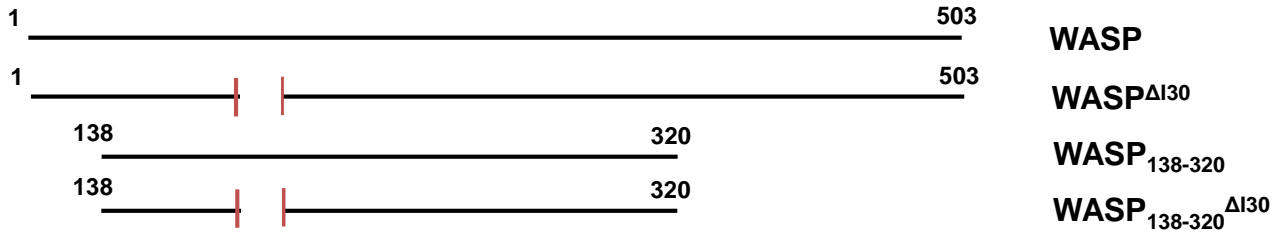

B)

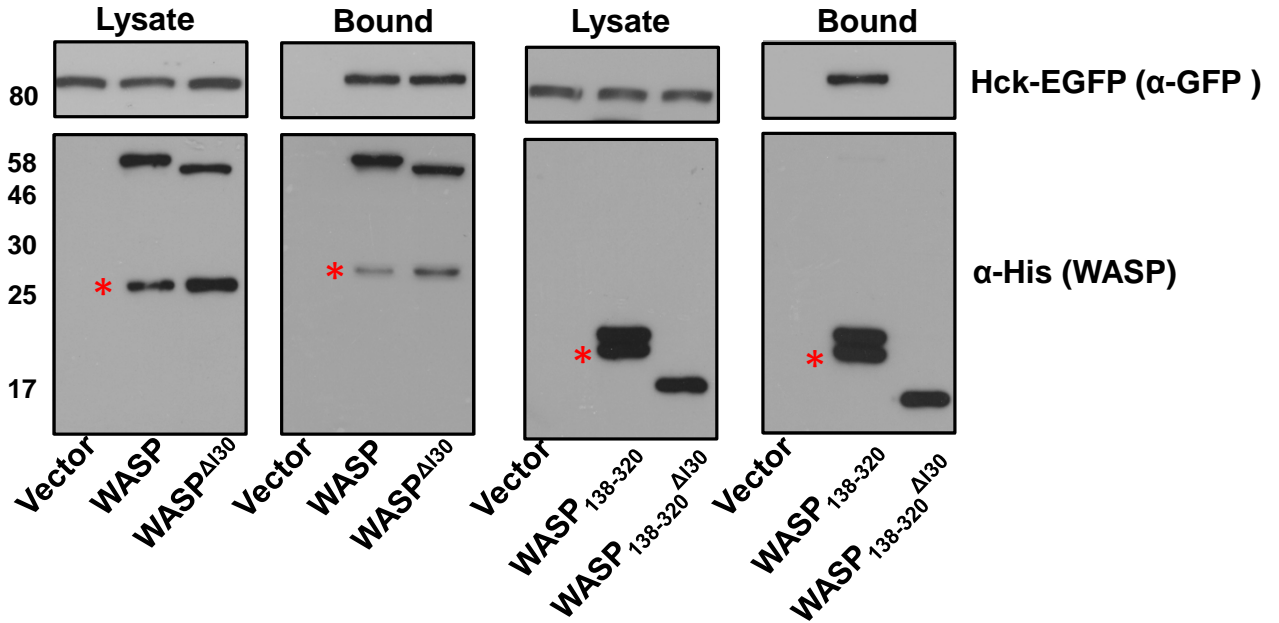

C)

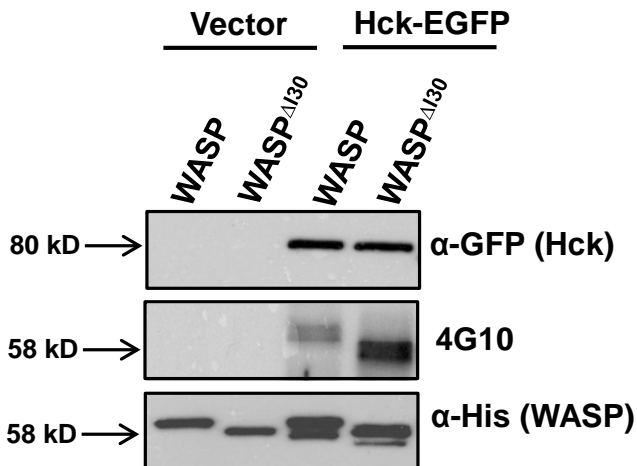

S6)

Jurkat<sup>W<sub>KD</sub></sup> T-cells+

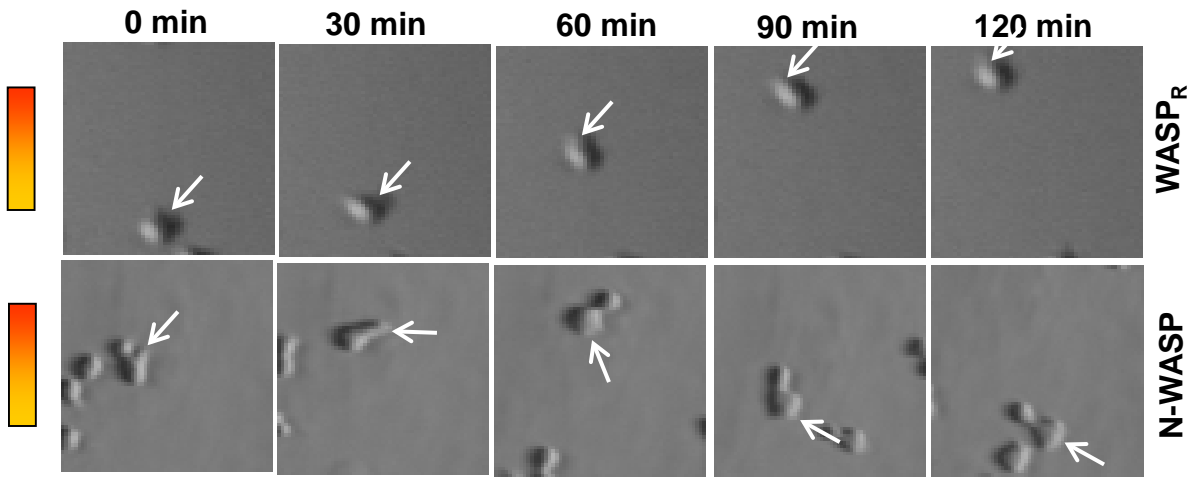

Supplement: srep15031-s1.pdf [file srep15031-s1.pdf]
